# Supplementary material for: Activation of Early Proinflammatory Responses by TBEV NS1 Varies between the Strains of Various Subtypes
Source: MDPI journal article supplement (doi:10.3390/ijms24021011), 2023-01-05
Supplement: s1 [file s1]

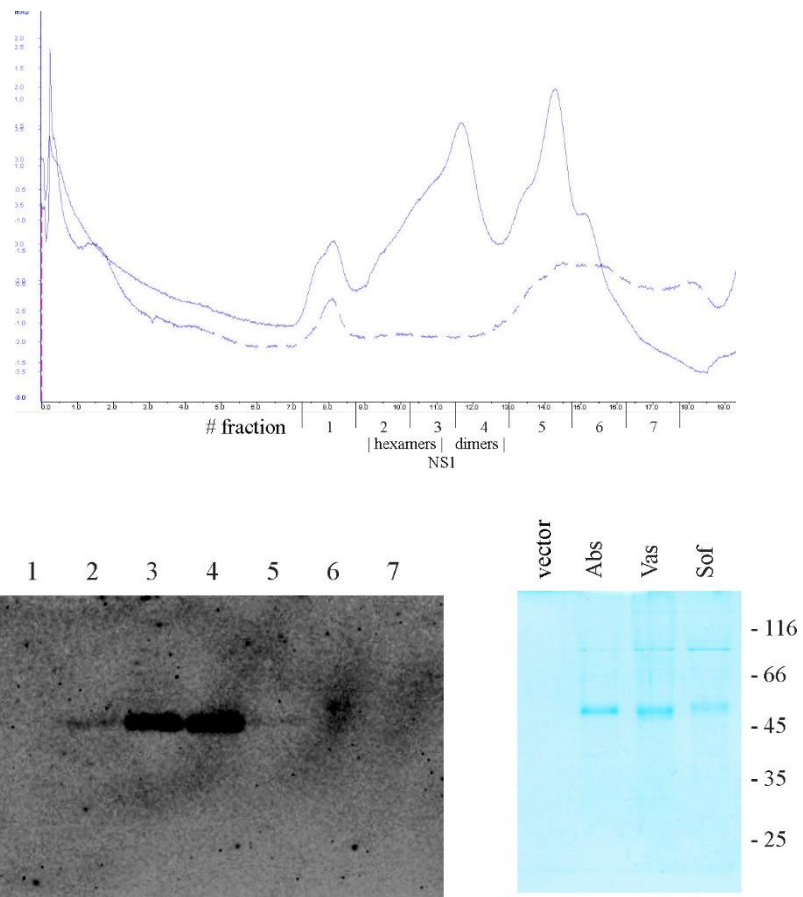

**Supplement Figure 1.** NS1 protein purification. **(a)** FPLC chromatography on Sephadex 200 of concentrated cell culture medium of NS1 encoding plasmid (solid line) or vector (dotted line) transfected 293T cells. **(b)** Western blot analysis of FPLC fractions with anti-NS1 antibodies (clone 4C4). **(c)** Fraction 3 and 4 were pooled and concentrated. Obtained NS1 samples were resolved by SDS-PAGE and stained with Coomassie blue.
